# Supplementary material
Source: PubMed Central journal article supplement (PMC3439519)
Supplement: NIHMS349071-supplement-1.pdf [file NIHMS349071-supplement-1.pdf]

**A** 1° human stellate cells

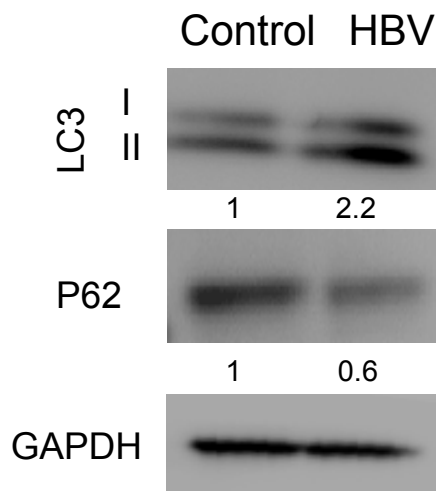

**C** 1° human pulmonary fibroblast

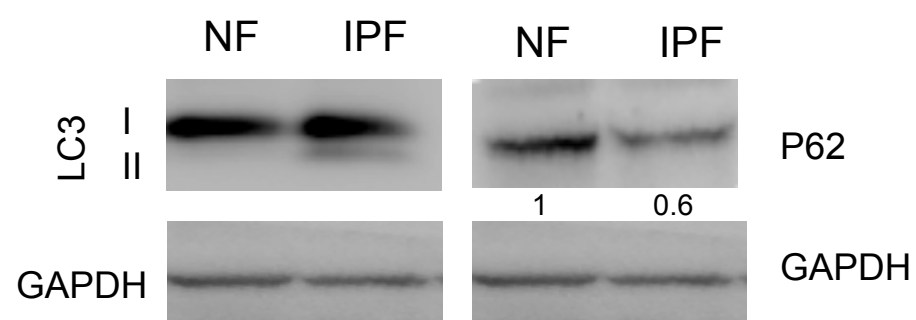

**B** Control

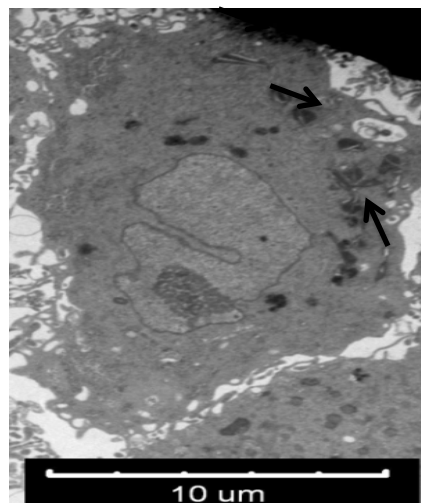

HBV

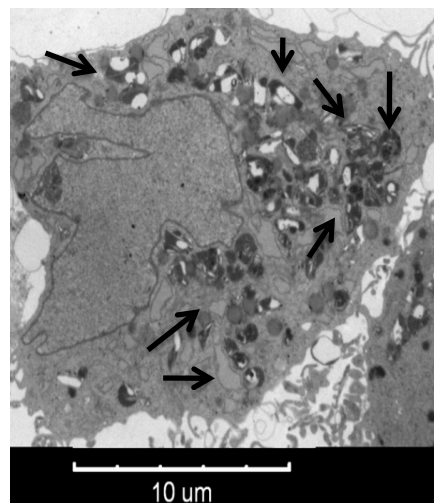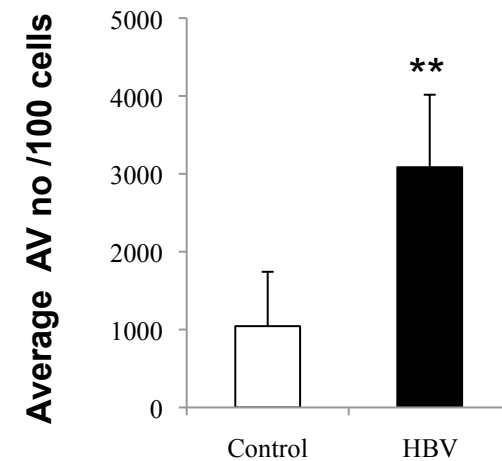

**Supplemental Figure 1. Autophagy is upregulated in human stellate cells after liver injury *in vivo* and in primary human fibroblasts from patients with idiopathic pulmonary fibrosis**

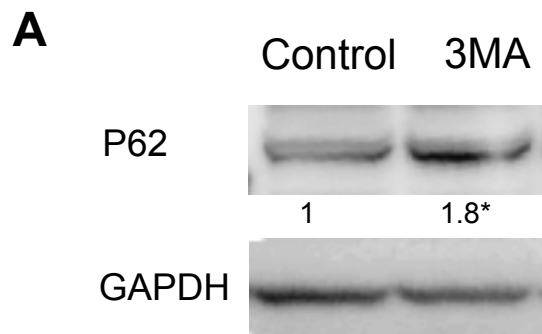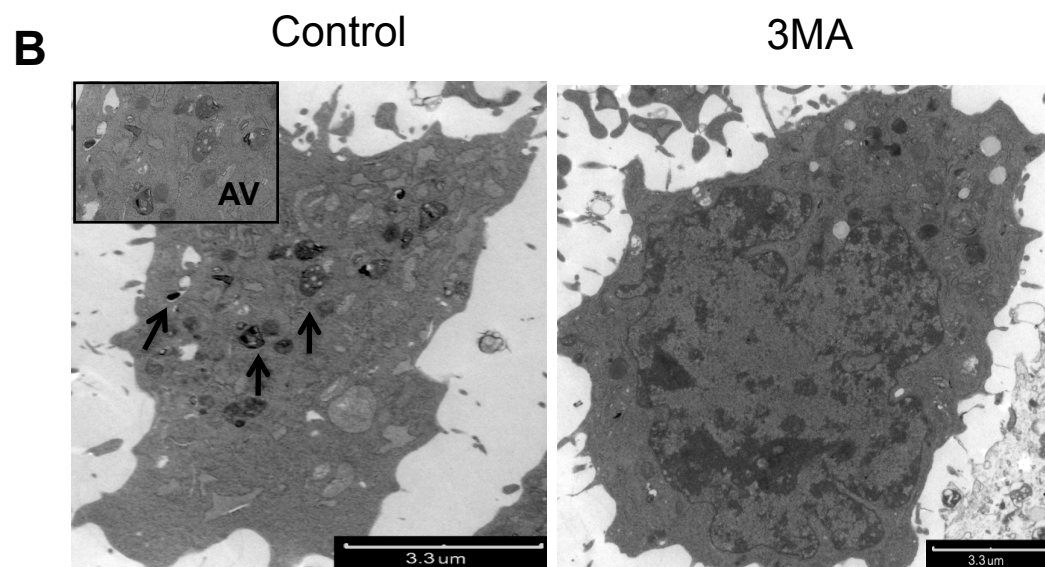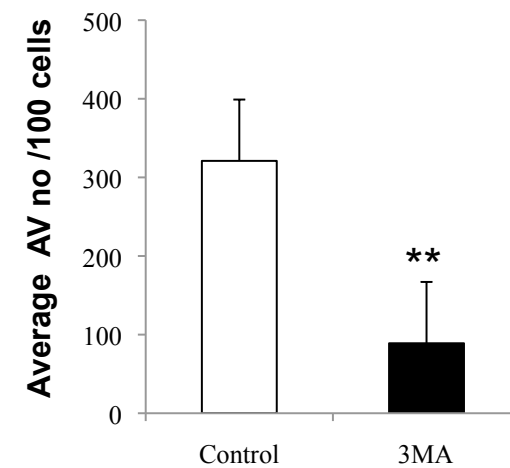

**Supplemental Figure 2. 3MA blocks autophagy in stellate cells**

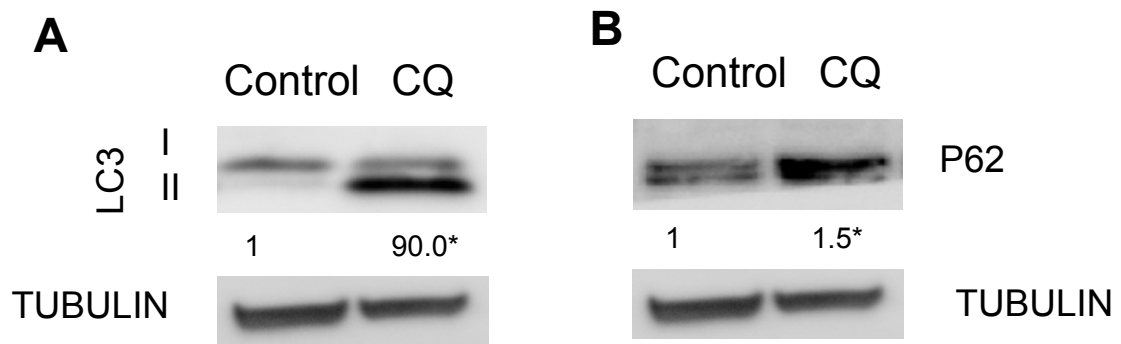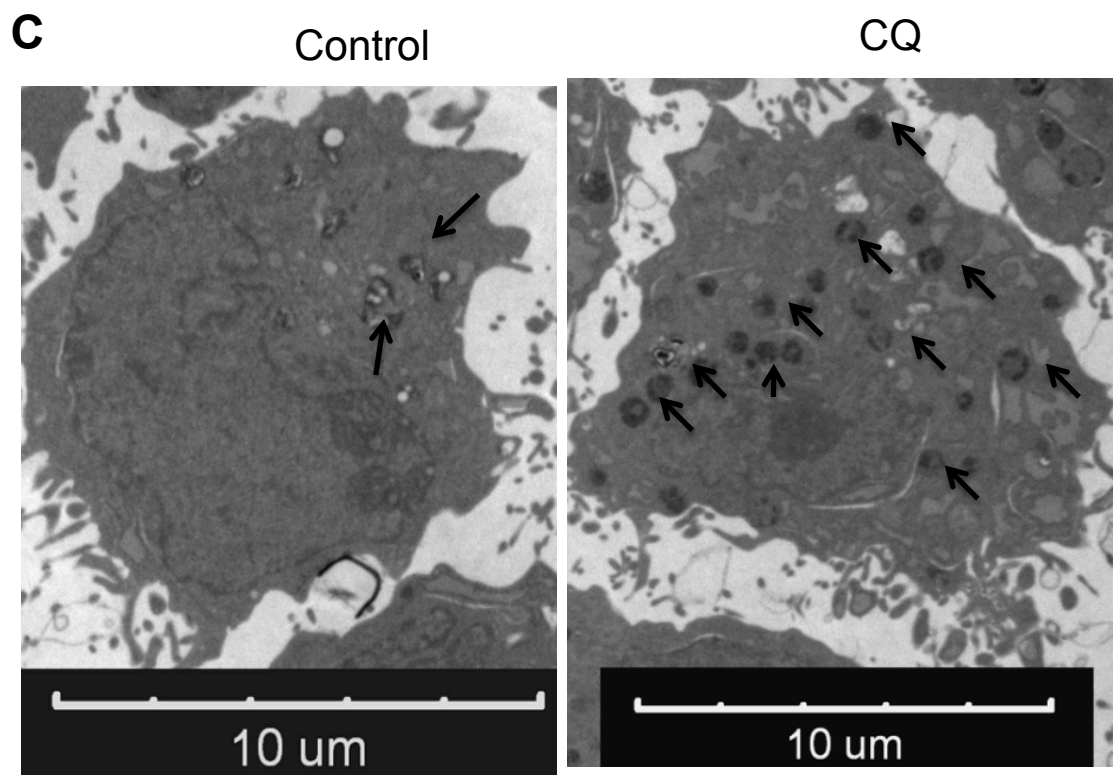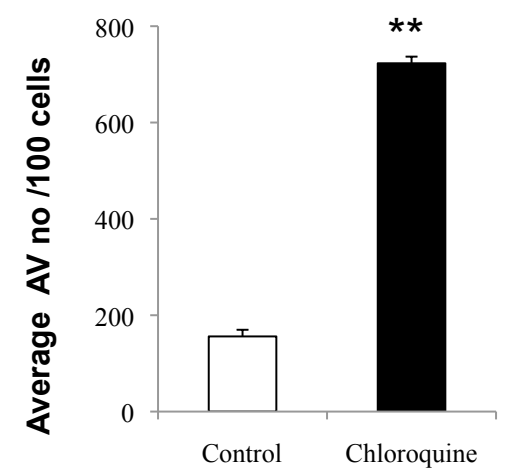

Supplemental Figure 3. Chloroquine blocks autophagy in stellate cells

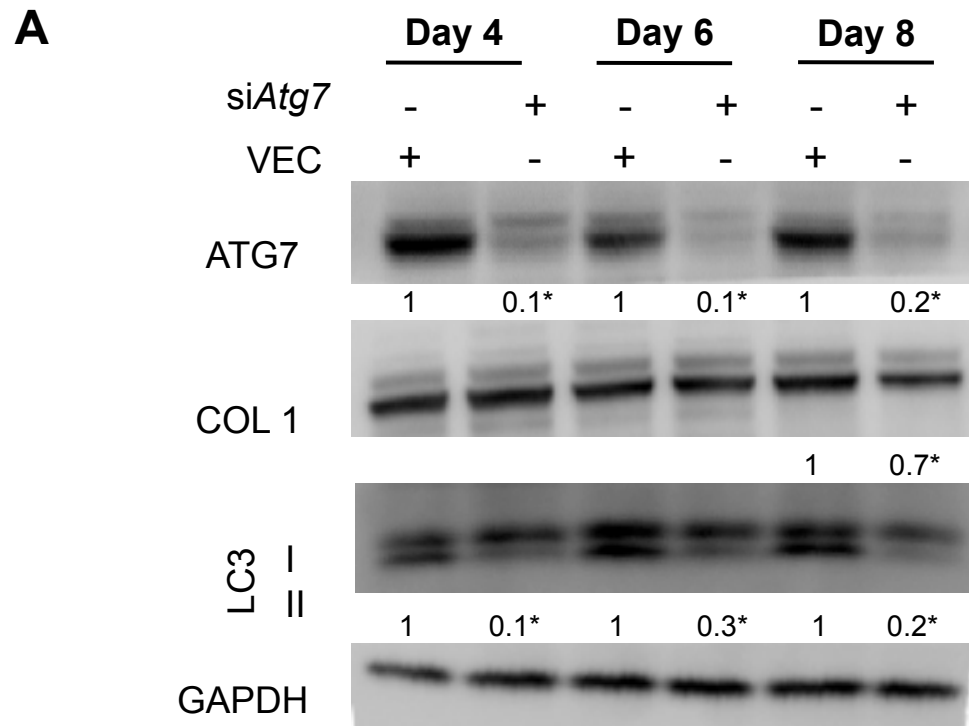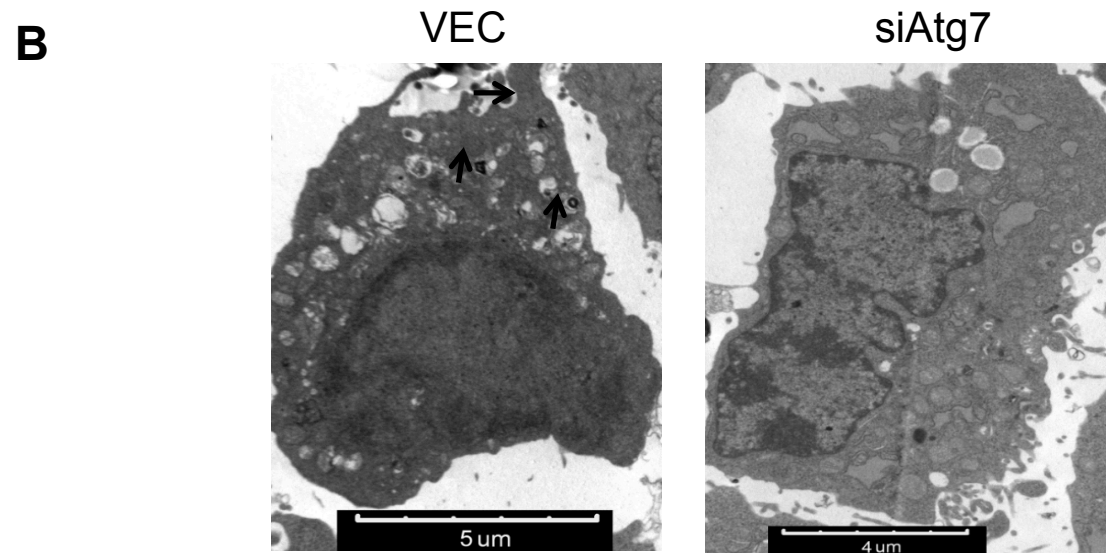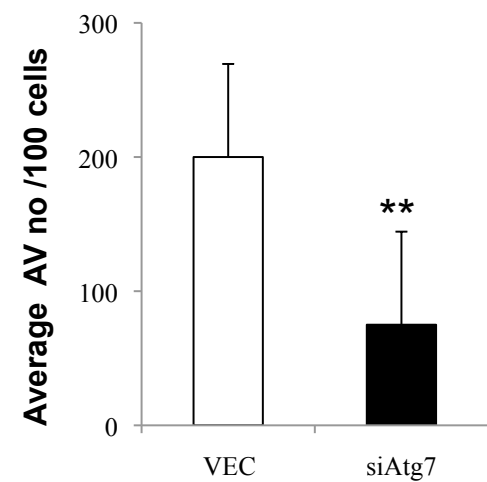

Supplemental Figure 4. Autophagy is attenuated in stellate cells by silencing *Atg7*.

**A**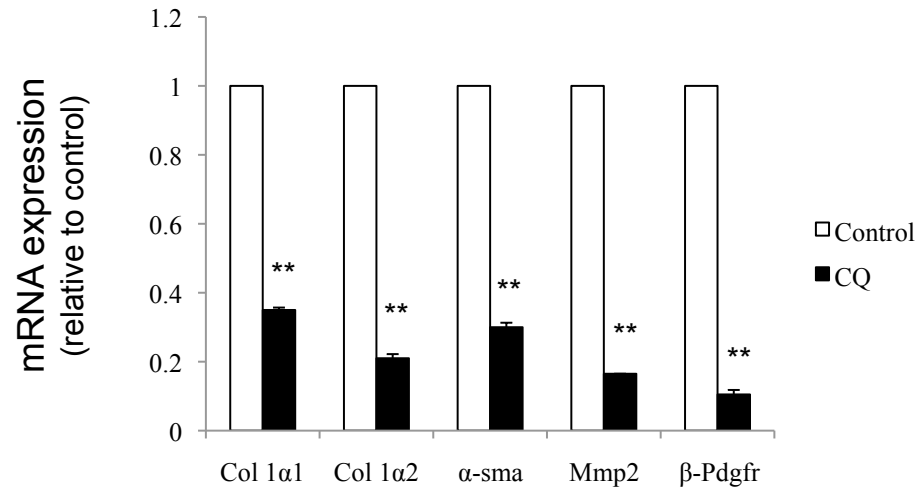**B**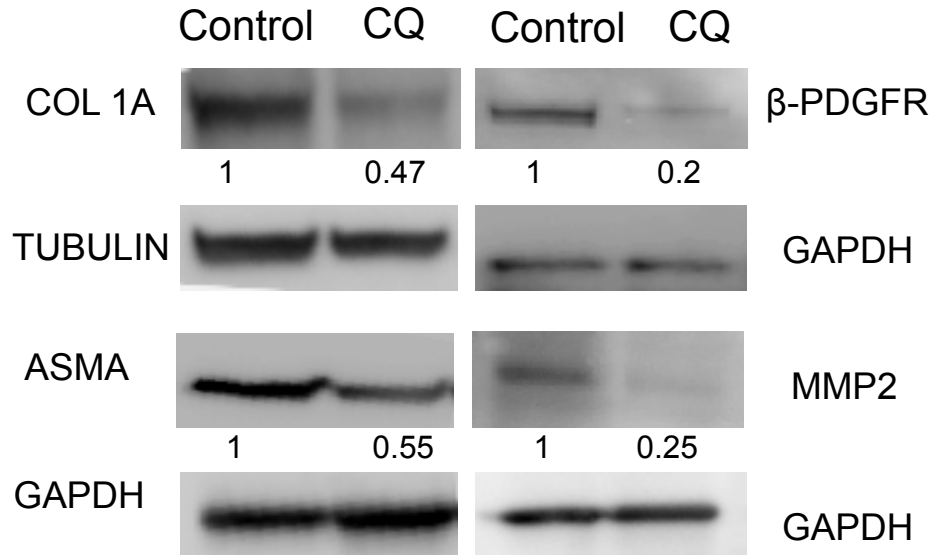

Supplemental Figure 5. Treatment with chloroquine in stellate cells decreases fibrogenesis

**A**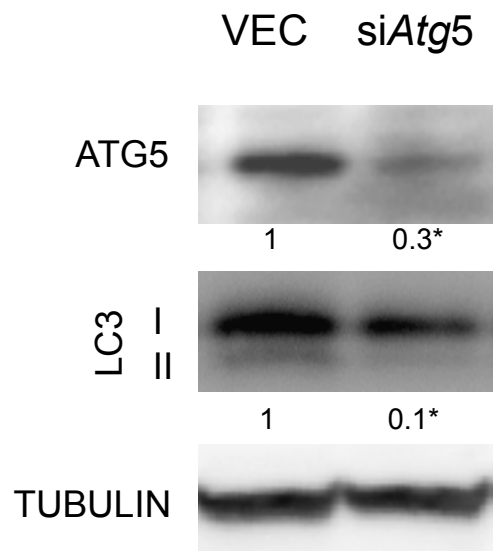**B**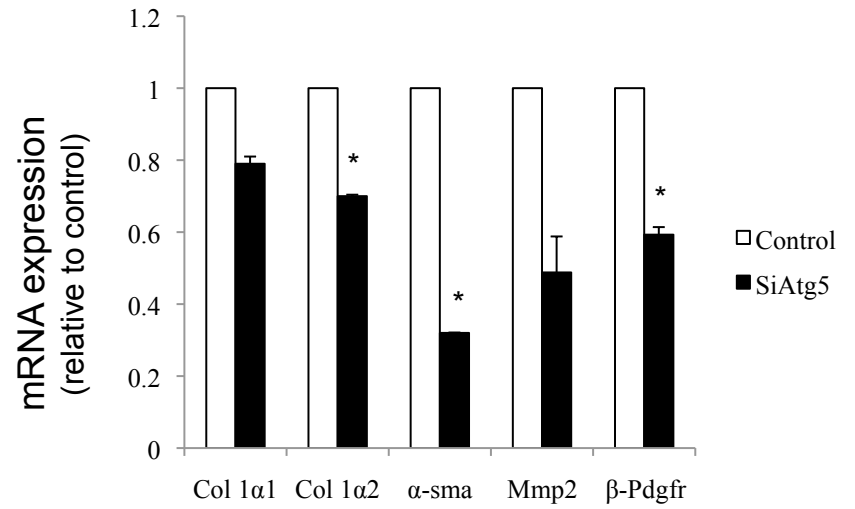**C**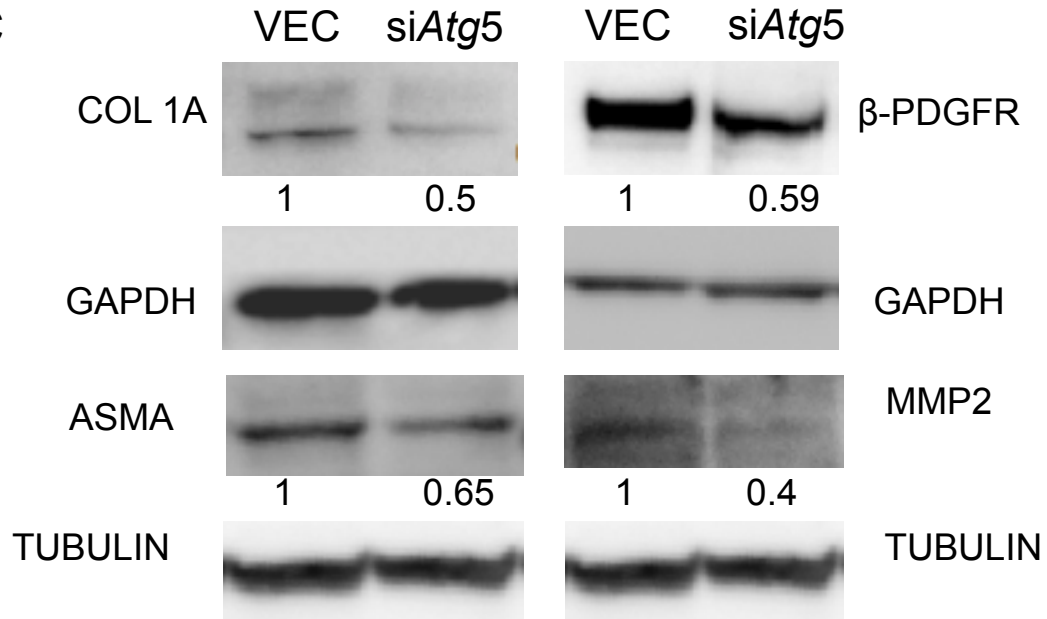

**Supplemental Figure 6. Knockdown of Atg5 in stellate cells decreases fibrogenesis.**

**A**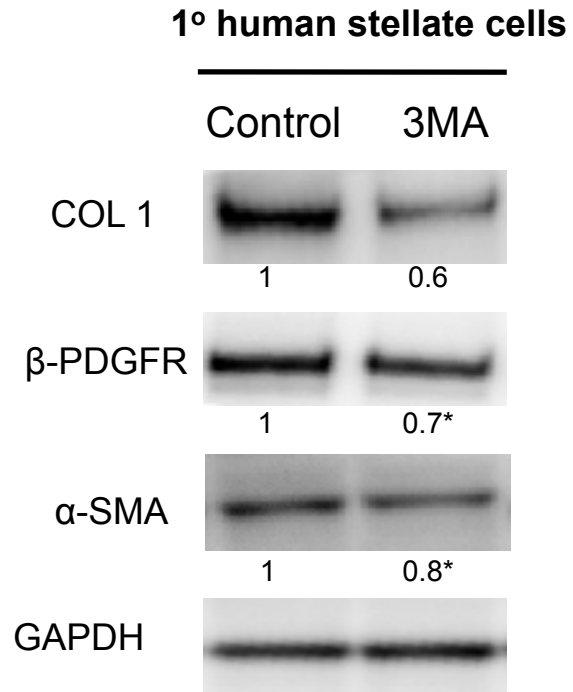**B**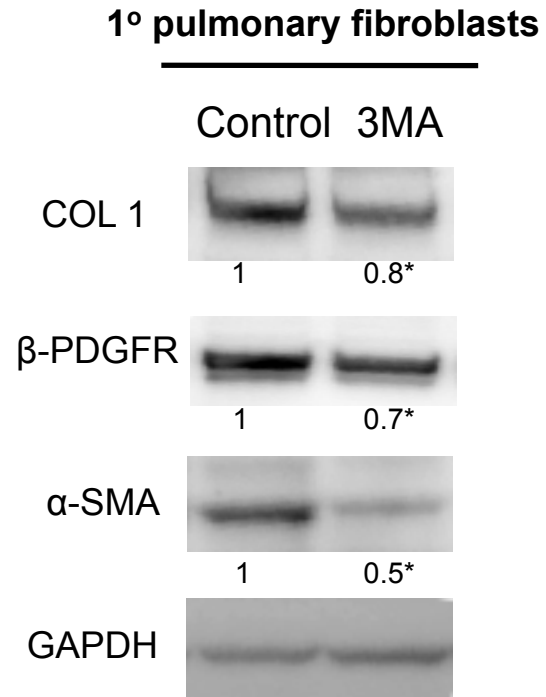

**Supplemental Figure 7. Treatment with 3MA in human stellate cells and pulmonary fibroblasts decreases fibrogenesis**

**A**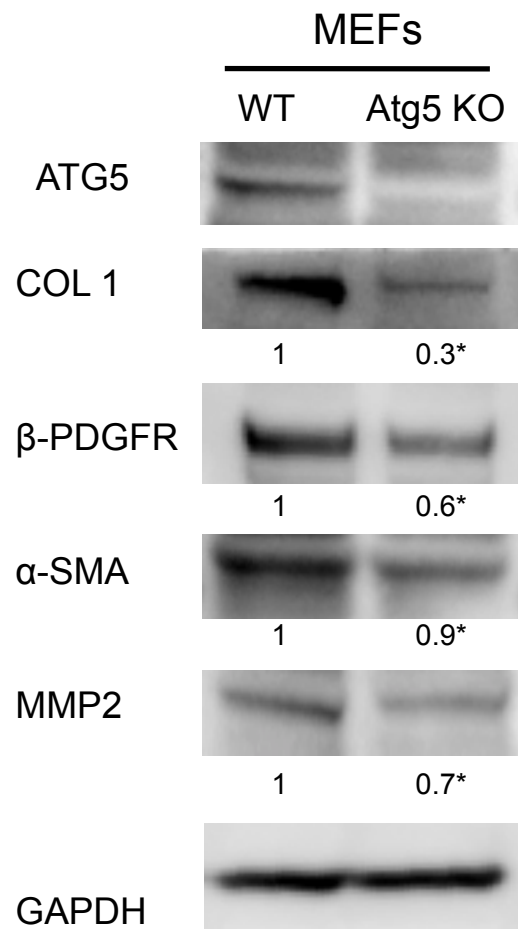**B**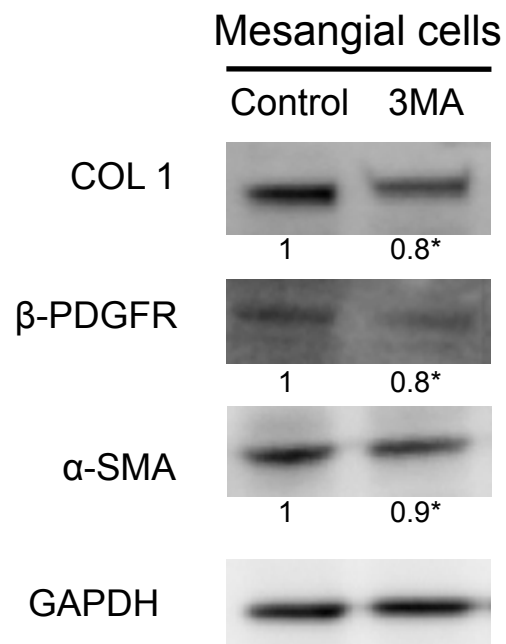**C**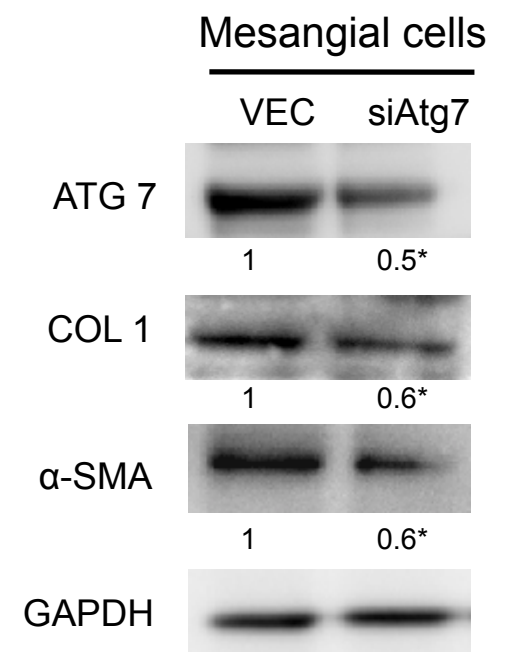

Supplemental Figure 8. Embryonic fibroblasts from Atg5 KO mice have reduced fibrogenesis.



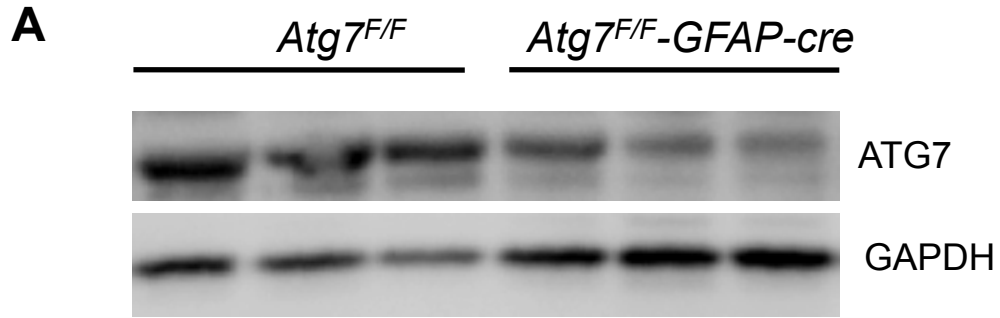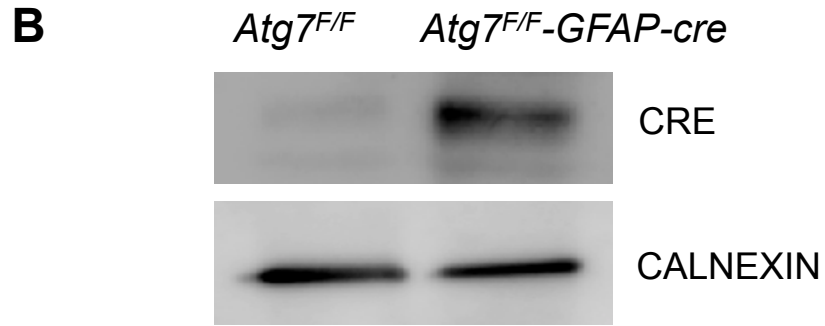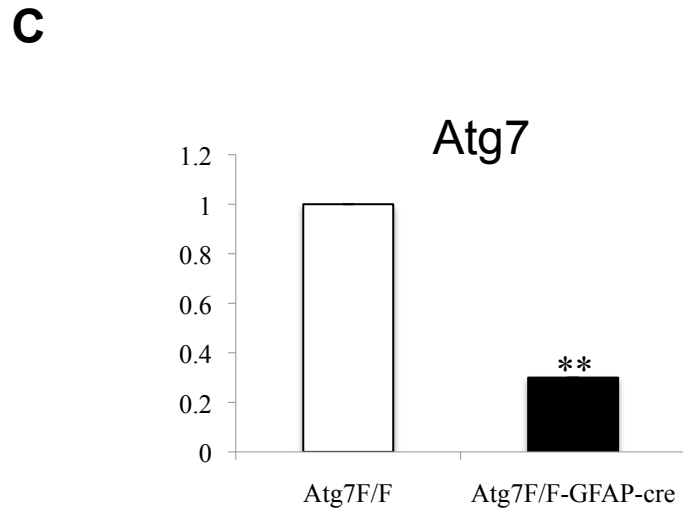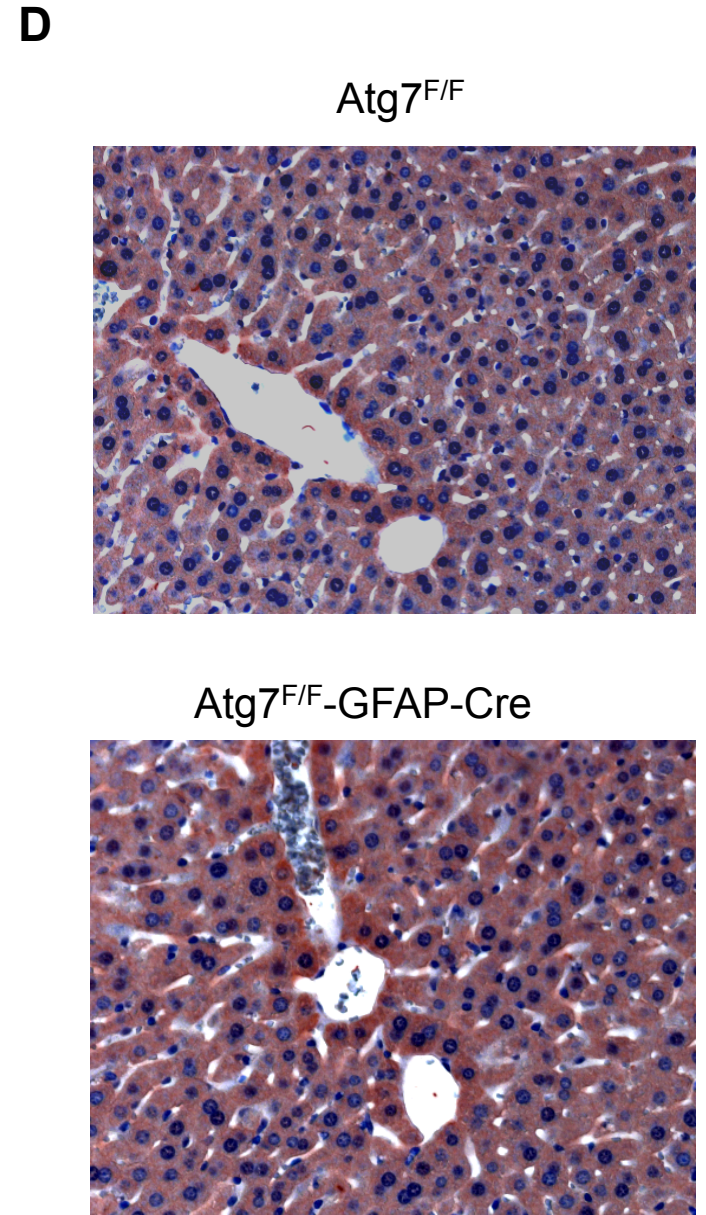

Supplemental Figure 9 . *Atg7<sup>F/F</sup>-GFAP-Cre* mice characterization

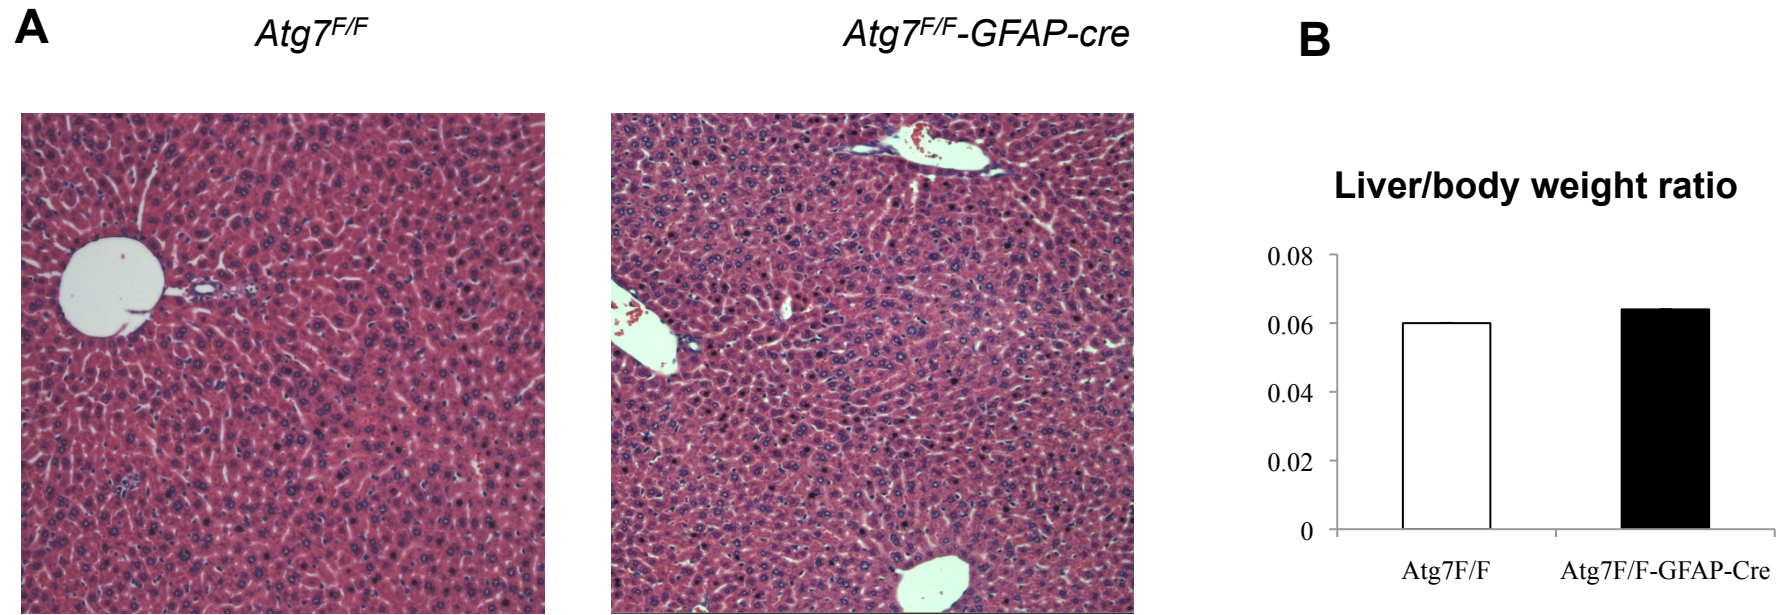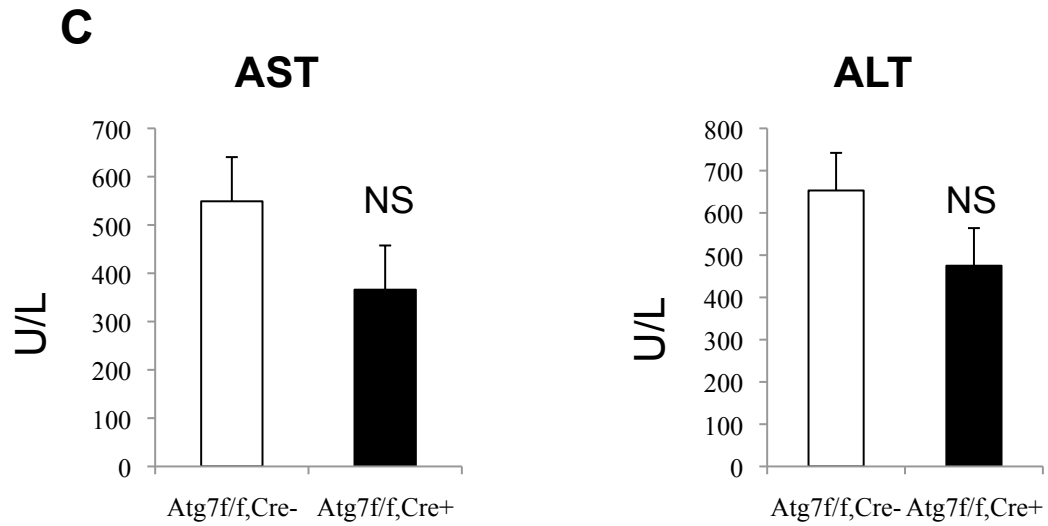

**Supplemental Figure 10. Blocking autophagy in stellate cells does not amplify liver injury**

*Atg7<sup>F/F</sup>*

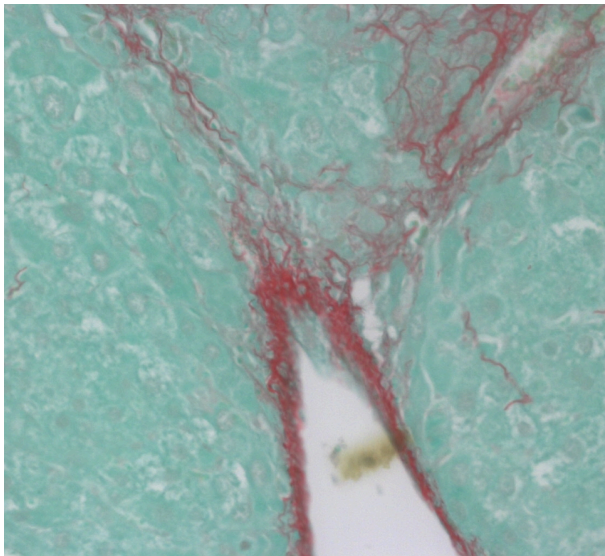

*Atg7<sup>F/F</sup>-GFAP-cre*

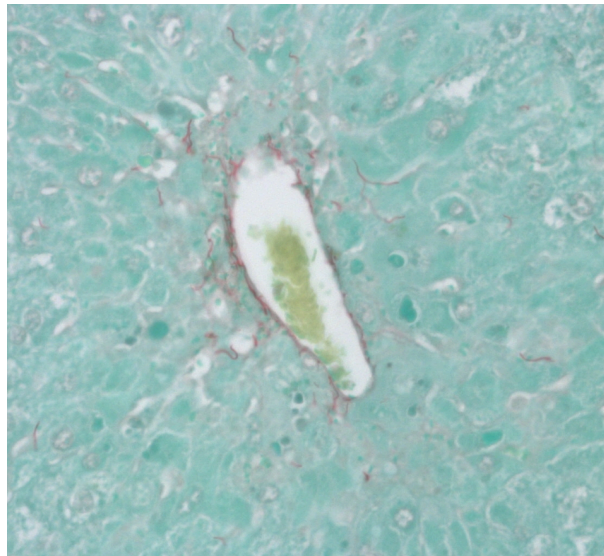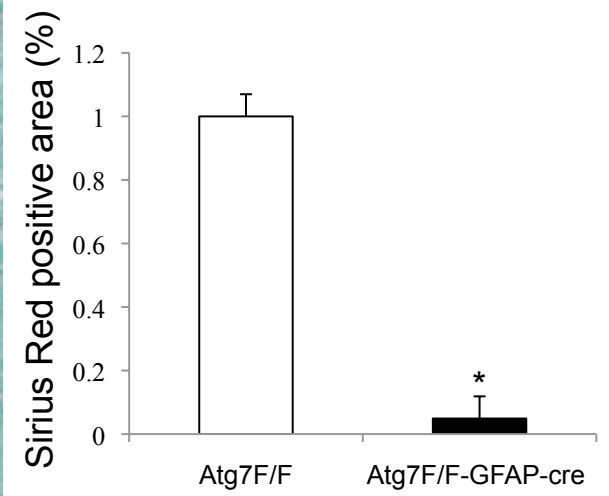

**Supplemental Figure 11. . Autophagy regulates stellate cell activation and fibrosis in vivo**

**A**

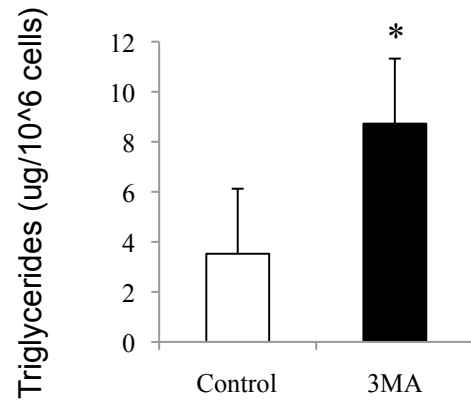

**B**

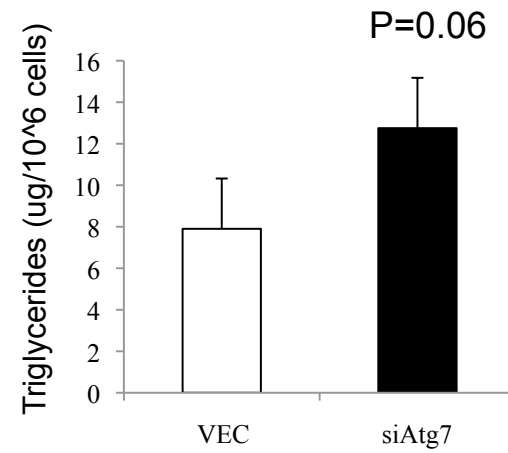

**Supplemental Figure 12. Triglyceride content is increased in autophagy-deficient stellate cells**

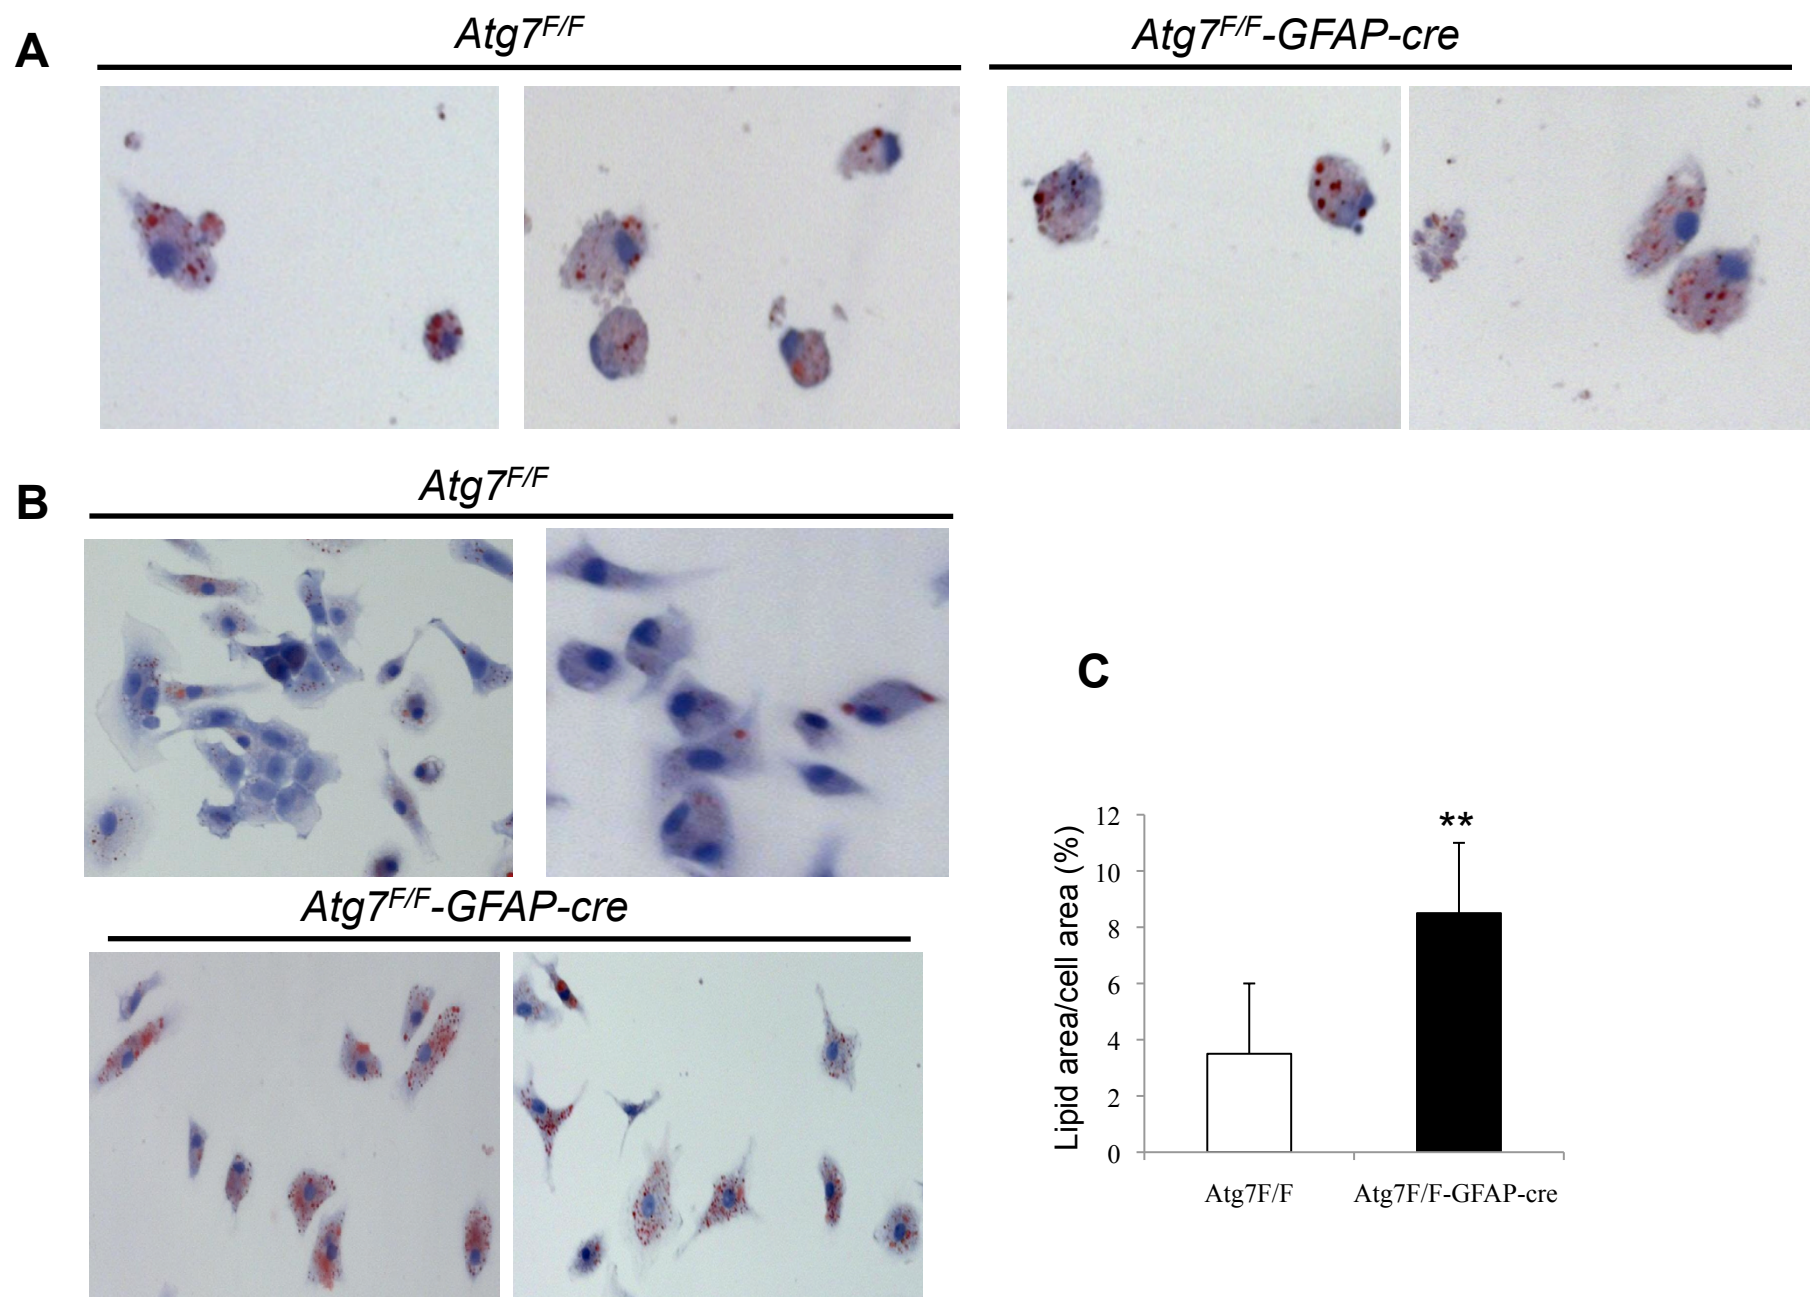

**Supplemental Figure 13. Inhibition of autophagy in stellate cells leads to LD accumulation associated with increased expression of adipose differentiation related protein (ADRP).**

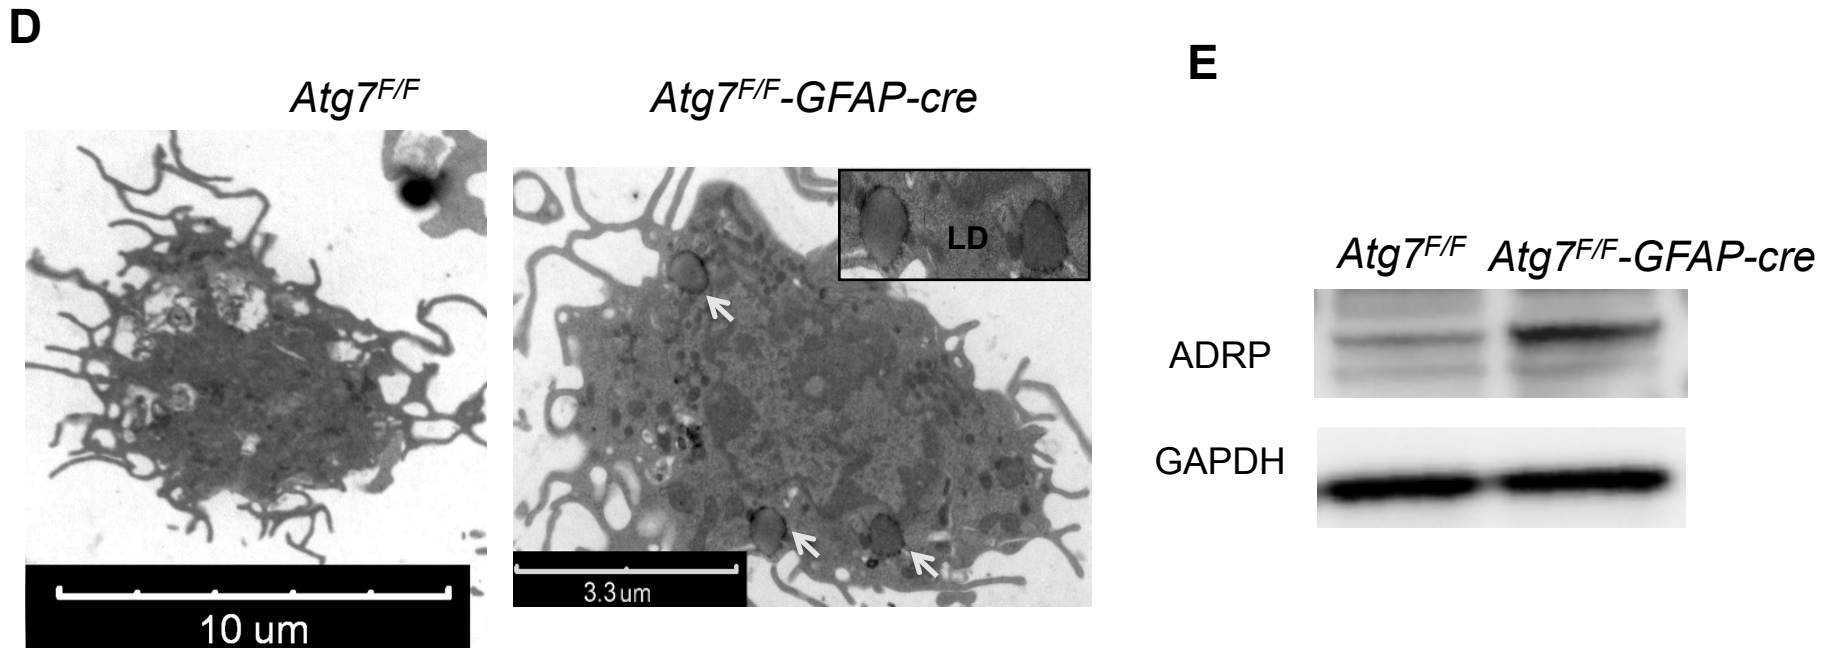

**Supplemental Figure 13. Inhibition of autophagy in stellate cells leads to LD accumulation associated with increased expression of adipose differentiation related protein (ADRP).**
