# Supplementary material
Source: PubMed Central journal article supplement (PMC3439519)
Supplement: NIHMS349071-supplement-2.pdf [file NIHMS349071-supplement-2.pdf]

**Supplemental Figure 1. . Autophagy is upregulated in human stellate cells after liver injury *in vivo* and in primary human fibroblasts from patients with idiopathic pulmonary fibrosis**

(A) Immunoblots of human stellate cells isolated from 2 HBV infected livers and 2 non-infected controls. (C) Immunoblots of fibroblasts from 3 non-fibrotic lungs (NF) and 3 from idiopathic pulmonary fibrosis (IPF) lungs. (A,C) HBV and IPF cells displayed an increase in LC3 conversion, decrease in P62, and (B) a statistically significant increase in AV number on EM analysis. AV, autophagic vacuole. Arrows indicate AV. *Right:* Electron micrograph quantification of AV number per 100 cells (\*\*P<0.001. Error bars s.e.m.). Protein ratios (normalized to GAPDH) were used to quantify fold change relative to control, and are shown below each blot.

**Supplemental Figure 2. 3MA blocks autophagy in stellate cells.** Effect of 3MA treatment on autophagy levels in JS1 mouse stellate cells: (A) Immunoblots showing an increase in P62. (B) Electron micrographs demonstrating a decreased number of AV in 3MA treated cells and AV quantification per hundred cells (\*\*P<0.001. Error bars, s.e.m.). Arrows indicate AV.

**Supplemental Figure 3. Chloroquine (CQ) blocks autophagy in stellate cells.** Effect of CQ treatment on autophagy levels in JS1 cells (A,B) Immunoblots demonstrating accumulation of LC3-II and increase in P62. (C) Electron micrographs showing impairment in AV degradation leading to accumulation of AV in different stages. Arrows indicate AV. *Right:* AV quantification per hundred cells (\*\*P<0.001. Error bars, s.e.m.). Protein ratios (normalized to tubulin) were used to quantify fold-change relative to control, and are shown below each blot. Data represent the mean value of at least 3 experiments (\*P<0.05).

**Supplemental Figure 4. Autophagy is attenuated in stellate cells by silencing *Atg7*.** (A,B) JS1 cells were transduced with either empty lentiviral vector (VEC) or vector expressing shRNA to the essential autophagy gene *Atg7* (si*Atg7* cells). (A) Immunoblots demonstrating a decrease in ATG7 expression at different time points, corresponding to decreased LC3II levels and collagen I. Data represent the mean value of at least 3 experiments (\*P<0.05). Protein ratios (normalized to tubulin) were used to

quantify fold-change relative to control, and are shown below each blot. Data represent the mean value of at least 3 experiments (\*P<0.05).

(B) EM demonstrating a decrease in AV number in siAtg7 cells (\*\*P<0.001. Error bars, s.e.m.). Arrows indicate AV *Right*: AV quantification per hundred cells (\*\*P<0.001. Error bars, s.e.m.).

**Supplemental Figure 5. Treatment with chloroquine in stellate cells decreases fibrogenesis.** CQ treatment decreases (A) *Col 1 $\alpha$ 1*, *Col 1 $\alpha$ 2*,  *$\alpha$ -sma*, *Mmp2* and  *$\beta$ -Pdgfr* mRNA (quantitative RT-PCR analysis) and (B) protein expression (immunoblot). (\*P<0.05, \*\*P<0.001. Error bars, s.e.m.). Protein ratios (normalized to GAPDH) were used to quantify fold-change relative to control, and are shown below each blot. Data represent the mean value of at least 3 experiments (\*P<0.05).

**Supplemental Figure 6. Autophagy is attenuated in stellate cells by silencing Atg5.** JS1 cells were transduced with either empty lentiviral vector (VEC) or vector expressing an shRNA to the essential autophagy gene *Atg5* (siAtg5 cells). (A) Immunoblots showing decreased ATG5 expression corresponding to a decrease in LC3II levels. siAtg5 cells display a decrease in (B) *Col 1 $\alpha$ 1*, *Col 1 $\alpha$ 2*,  *$\alpha$ -sma*, *Mmp2* and  *$\beta$ -Pdgfr* mRNAs (quantitative RT-PCR analysis) and (C) COL 1,  $\alpha$ -SMA,  $\beta$ -PDGFR and MMP2 protein expression (immunoblot). (\*P<0.05, \*\*P<0.001. Error bars, s.e.m.). Protein ratios (normalized to tubulin) were used to quantify fold-change relative to control, and are shown below each blot. Data represent the mean value of at least 3 experiments (\*P<0.05).

**Supplemental Figure 7. Treatment with 3MA in human stellate cells and pulmonary fibroblasts decreases fibrogenesis.** Primary human stellate cells as well as primary pulmonary fibroblasts both obtained from healthy individuals were treated with 3MA for 24 hours. 3MA treatment decreases COL 1,  $\alpha$ -SMA and  $\beta$ -PDGFR protein expression (immunoblot) in (A) human stellate cells and (B) human pulmonary fibroblasts. Protein ratios (normalized to GAPDH) were used to quantify fold-change relative to control, and are shown below each blot. Data represent the mean value of at least 3 experiments (\*P<0.05).

**Supplemental Figure 8. Atg5 KO mice embryonic fibroblasts and 3MA treated**

**mouse mesangial have reduced fibrogenesis. (A)** MEFs from *Atg5* KO mice, compared with MEFs from WT mice, display a decrease in COL 1,  $\alpha$ -SMA,  $\beta$ -PDGFR and MMP2 protein expression (immunoblot). **(B)** 3MA treatment decreases COL 1,  $\alpha$ SMA and  $\beta$ -PDGFR protein expression (immunoblot) in mesangial cells. **(C)** genetic knockdown of *Atg7* in mesangial cells decreases COL 1 and  $\alpha$ -SMA. Protein ratios (normalized to GAPDH) were used to quantify fold-change relative to control, and are shown below each blot. Data represent the mean value of at least 3 experiments (\*P<0.05).

**Supplemental Figure 9. *Atg7<sup>F/F</sup>-GFAP-cre* mice characterization. (A)** immunoblot showing *Atg7* expression in HSCs isolated from *Atg7<sup>F/F</sup>-GFAP-cre* and *Atg7<sup>F/F</sup>* mice. **(B)** Immunoblot showing expression of CRE recombinase in stellate cells from *Atg7<sup>F/F</sup>-GFAP-cre* mice compared to their *Atg7<sup>F/F</sup>* littermates. **(C)** *Atg7* mRNA (quantitative RT-PCR analysis) levels in HSCs isolated from *Atg7<sup>F/F</sup>-GFAP-cre* and *Atg7<sup>F/F</sup>* mice. **(D)** Whole liver *Atg7* immunohistochemistry in *Atg7<sup>F/F</sup>-GFAP-cre* and *Atg7<sup>F/F</sup>* mice. (\*P<0.05, \*\*P<0.001. Error bars, s.e.m.). Protein ratios (normalized to tubulin) were used to quantify fold-change relative to control, and are shown below each blot. Data represent the mean value of at least 3 experiments (\*P<0.05).

**Supplemental Figure 10. Blocking autophagy in stellate cells does not amplify liver injury. (A)** H&E staining of whole liver from untreated *Atg7<sup>F/F</sup>-GFAP-cre* and *Atg7<sup>F/F</sup>* mice. Representative data from an experiment performed in a total of 18 animals, 9 *Atg7<sup>F/F</sup>* and 9 *Atg7<sup>F/F</sup>-GFAP-cre*. **(B)** Liver to body weight ratio after CCl<sub>4</sub>-induced chronic liver injury. Results are shown as mean  $\pm$  s.e.m. (\*P<0.05). **(C)** Measurement of aspartate aminotransferase (AST) and alanine aminotransferase (ALT) and level. (Error bars, s.e.m.). A total of 10 animals, 5 *Atg7<sup>F/F</sup>* and 5 *Atg7<sup>F/F</sup>-GFAP-cre* were used.

**Supplemental Figure 11. Loss of stellate cell autophagy attenuates fibrosis in vivo.** Whole liver sections after chronic liver injury with TAA were stained for Sirius red. Right: quantification of Sirius red positive area. A total of 10 animals, 5 *Atg7<sup>F/F</sup>* and 5 *Atg7<sup>F/F</sup>-GFAP-cre* were treated with 4 doses TAA i.p. every other day. (\*P<0.05, \*\*P<0.001. Error bars, s.e.m.).

**Supplemental Figure 12. . Triglyceride content is increased in autophagy-deficient stellate cells.** (A) 3MA treated JS1 cells, (B) siAtg7 cells (levels are expressed in  $\mu\text{g}$  triglyceride per  $10^6$  cells). (\* $P < 0.05$ , \*\* $P < 0.001$ . Error bars, s.e.m.).

**Figure 13. Inhibition of autophagy in stellate cells leads to LD accumulation associated with increased expression of adipose differentiation related protein (ADRP).** Oil red O (ORO) staining in stellate cells isolated from *Atg7<sup>F/F</sup>* and *Atg7<sup>F/F</sup>-GFAP-cre* mice (A) plated for 24 hours, or (B) activated in vivo with 3 doses of  $\text{CCl}_4$  and briefly plated (48 hours) (n=6); (C) ORO stained area quantified using Image J software. (D) Electron micrographs showing lipid droplet content and (E) immunoblots for ADRP in isolated stellate cells. Representative data from an experiment performed in a total of 10 animals, 5 *Atg7<sup>F/F</sup>* and 5 *Atg7<sup>F/F</sup>-GFAP-cre*.
